# Supplementary material for: A new pyranopyrazole based colorimetric chemosensor for the selective recognition of biothiols: applications in real samples
Source: Royal Society of Chemistry journal article supplement (doi:10.1039/d4ay02099e), 2024-12-06
Supplement: d4ay02099e1.pdf [file d4ay02099e1.pdf]

## Electronic Supplementary Information

### A new pyranopyrazole based colorimetric chemosensor for the selective recognition of Biothiols: Applications in real samples

Swati Negi<sup>a</sup>, Priya Takkar<sup>a</sup>, Parveen Gahlyan<sup>a</sup>, Rakesh Kumar<sup>a\*</sup>

<sup>a</sup> Bio-organic Laboratory, Department of Chemistry, University of Delhi, Delhi 110007, India

\* Corresponding author

Email: rakeshkp@email.com

Figure 1. <sup>1</sup>H NMR of compound **5** in (DMSO-*d*<sub>6</sub>, 400 MHz)

Figure 2. <sup>13</sup>C NMR of compound **5** in (DMSO-*d*<sub>6</sub>, 100 MHz)

Figure 3. <sup>1</sup>H NMR of compound **P1** in (DMSO-*d*<sub>6</sub>, 400 MHz)

Figure 4. <sup>13</sup>C NMR of compound **P1** in DMSO-*d*<sub>6</sub>, 100 MHz)

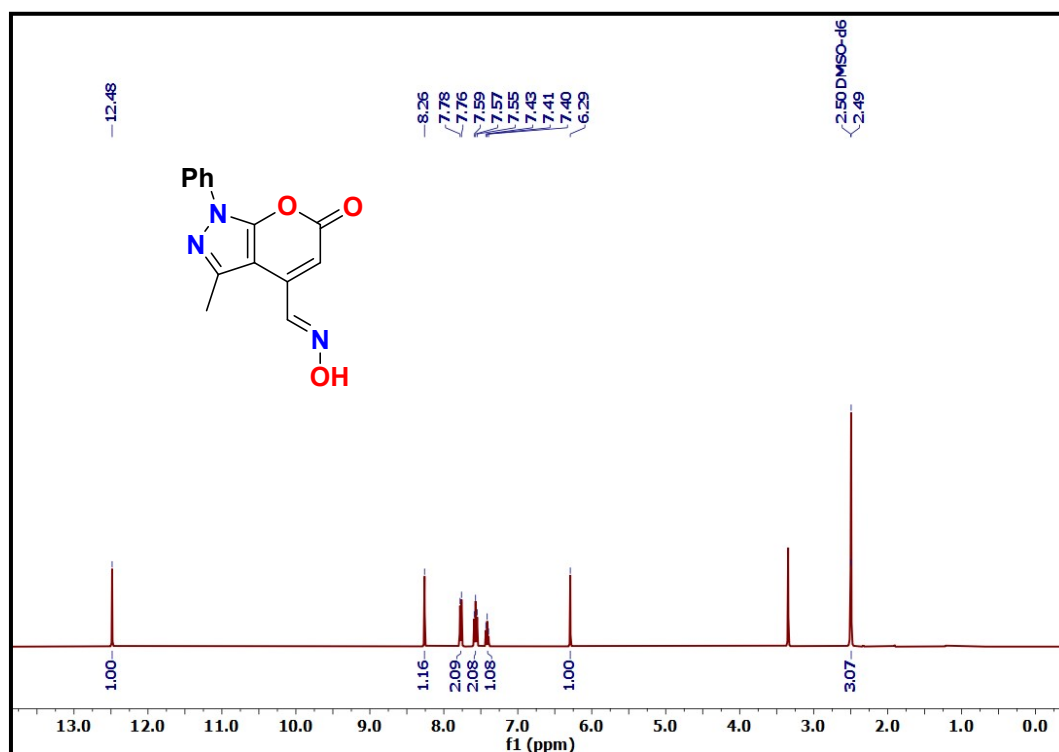

Figure 1. <sup>1</sup>H NMR Spectra of compound **5** (400MHz, DMSO- *d*<sub>6</sub>)

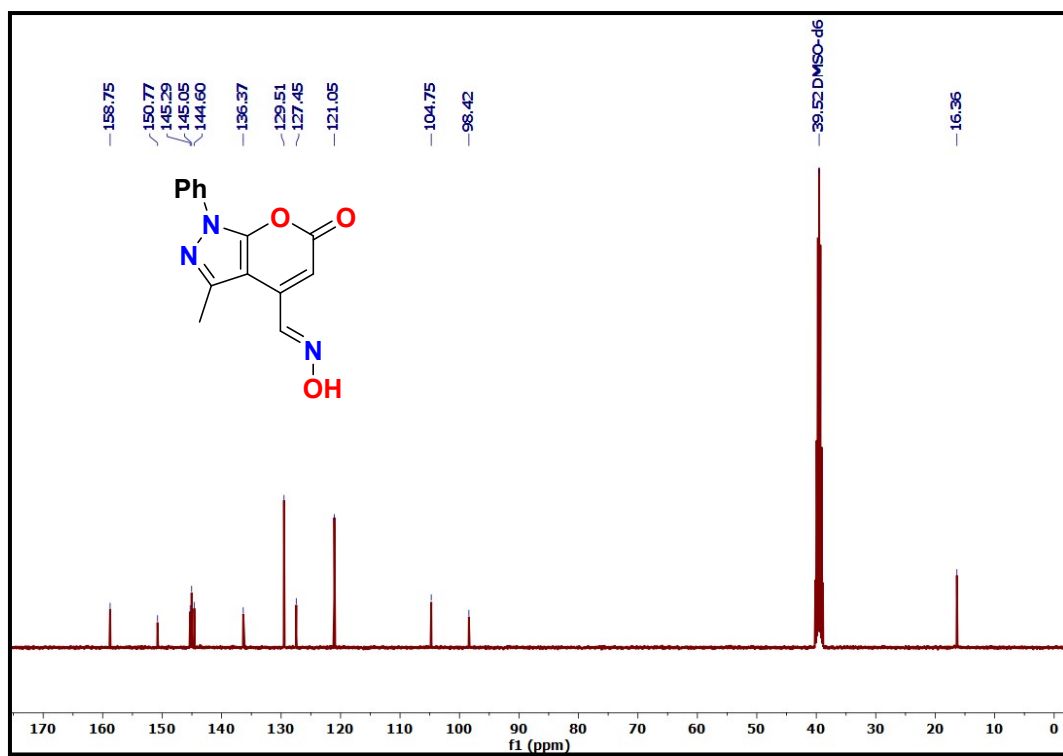

**Figure 2.** <sup>13</sup>C NMR Spectra of compound 5 (100MHz, DMSO- *d*<sub>6</sub>)

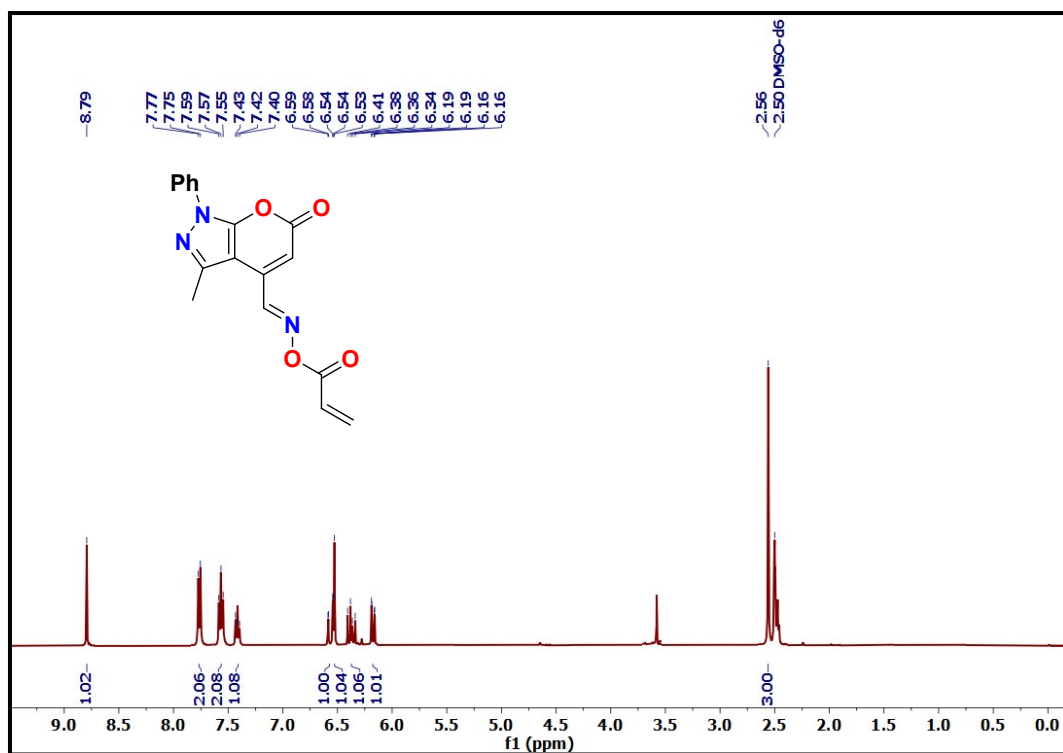

Figure 3. <sup>1</sup>H NMR Spectra of compound P1 (400MHz, DMSO- *d*<sub>6</sub>)

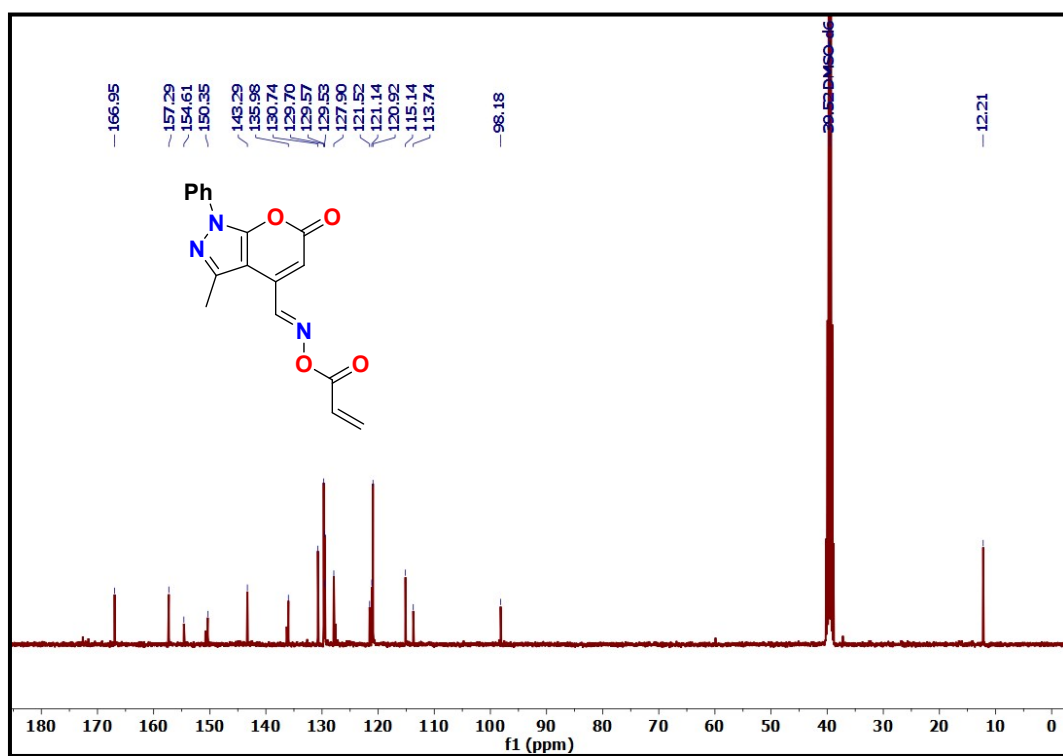

Figure 4. <sup>13</sup>C NMR Spectra of compound P1 (400MHz, DMSO- *d*<sub>6</sub>)
